# Supplementary material for: The ionothermal synthesis, structure, and magnetism–structure relationship of two biphenyl tetracarboxylic acid-based metal–organic frameworks
Source: Royal Society of Chemistry journal article supplement (doi:10.1039/c4dt02042a), 2014-09-02
Supplement: c4dt02042a1.pdf [file c4dt02042a1.pdf]

## **Ionothermal Synthesis, Structure, Magnetism-Structure Relation of two Biphenyltetracarboxylic acid-based Metal-Organic Frameworks:**

**Wen-xian Chen, Li Tan, Qiu-ping Liu, Gen-rong Qiang, Gui-lin Zhuang\***

<sup>a</sup> Institute of Industrial Catalysis, College of Chemical Engineering, Zhejiang University of Technology, Hangzhou, People's Republic of China, 310032. Fax: (+86)571-88871037 Tel: (+86)571-88871037. Email: [glzhuang@zjut.edu.cn](mailto:glzhuang@zjut.edu.cn).

### **1. Experimental**

All the reagents were of commercial origin without further purification. The C, H, and N element analyses were performed by use of a CE instruments EA 1110 elemental analyzer. The infrared spectra were measured on a Nicolet AVATAR FT-IR360 Spectrophotometer with pressed KBr pellets. The X-ray powder diffractometry (XRPD) study was performed on Panalytical X-Pert pro diffractometer with Cu-K $\alpha$  radiation. TGA curves were prepared on a SDT Q600 Thermal Analyzer. The Co/Na ratio was determined in a Thermo Elemental Atomic absorption spectrophotometer. Magnetic measurements were performed by a Quantum Design MPMS superconducting quantum interference device (SQUID).

Single crystals having suitable dimensions for compounds **1-2** were used for data collection using a CrysAlis CCD diffractometer ( Xcalibur, Eos, Gemini ultra ) at 298 K equipped with Enhance (Mo) X-ray Source ( $\lambda = 0.71073 \text{ \AA}$ ). Integration and cell refinement was carried out using CrysAlis RED. The absorption correction was performed by multi-scan method using SCALE3 ABSPACK scaling algorithm. All Corrections were made for Lorentz and polarization effects. The molecular structures were solved by direct methods (SHELXL-86/SHELXL-97) and refinement by full-matrix least-squares on  $F^2$  (SHELXS-97). Crystal data and selective bond length and bond angle of compounds **1-2** are given in Table S1 and S2.

**Table S1 Crystallographic Data and Details of Data Collection and Refinement for 1-4**

| Compound                                                        | 1                                                                                              | 2                                                                              |
|-----------------------------------------------------------------|------------------------------------------------------------------------------------------------|--------------------------------------------------------------------------------|
| Formula                                                         | C <sub>58</sub> H <sub>43</sub> N <sub>2</sub> O <sub>28</sub> Na <sub>5</sub> Co <sub>3</sub> | C <sub>26</sub> H <sub>24</sub> N <sub>2</sub> O <sub>10</sub> Mn <sub>2</sub> |
| Mr                                                              | 1507.68                                                                                        | 634.35                                                                         |
| Crystal system                                                  | Orthorhombic                                                                                   | Monoclinic                                                                     |
| Space group                                                     | <i>Fddd</i>                                                                                    | <i>C2/c</i>                                                                    |
| <i>a</i> /Å                                                     | 25.655(5)                                                                                      | 30.577(6)                                                                      |
| <i>b</i> /Å                                                     | 28.561(6)                                                                                      | 13.818(3)                                                                      |
| <i>c</i> /Å                                                     | 32.001(6)                                                                                      | 16.241(3)                                                                      |
| $\alpha$ /°                                                     | 90                                                                                             | 90                                                                             |
| $\beta$ /°                                                      | 90                                                                                             | 115.81(3)                                                                      |
| $\gamma$ /°                                                     | 90                                                                                             | 90                                                                             |
| <i>V</i> /Å <sup>3</sup>                                        | 23448(8)                                                                                       | 6177.5(2)                                                                      |
| <i>Z</i>                                                        | 16                                                                                             | 8                                                                              |
| <i>D</i> <sub>calcd</sub> /g·cm <sup>-3</sup>                   | 1.708                                                                                          | 1.065                                                                          |
| $\mu$ /mm <sup>-1</sup>                                         | 0.973                                                                                          | 0.852                                                                          |
| No. of data/parameter                                           | 5024/442                                                                                       | 6053/273                                                                       |
| $\theta$ range/°                                                | 3.14-24.99                                                                                     | 3.06-26.00                                                                     |
| Obs reflns                                                      | 3952                                                                                           | 3557                                                                           |
| <i>R</i> <sub>1</sub> [ <i>I</i> > 2σ( <i>I</i> )] <sup>a</sup> | 0.0792                                                                                         | 0.0757                                                                         |
| <i>wR</i> <sub>2</sub> (all data) <sup>b</sup>                  | 0.2367                                                                                         | 0.2750                                                                         |

$${}^a R_1 = \sum ||F_o| - |F_c|| / \sum |F_o| \quad {}^b wR_2 = \{ \sum [w(F_o^2 - F_c^2)^2] / \sum [w(F_o^2)^2] \}^{1/2}$$

**Table S2 selective bond length and bond angle of 1 and 2.**

| Compound 1            |           |                                        |            |                                         |            |
|-----------------------|-----------|----------------------------------------|------------|-----------------------------------------|------------|
| Co1-O1                | 1.926(4)  | O1-Co1-O5                              | 105.79(18) | O6-Na1-O2 <sup>#9</sup>                 | 117.30(18) |
| Co1-O5                | 1.952(4)  | O1-Co1-O12 <sup>#1</sup>               | 131.18(19) | O6-Na1-O3 <sup>#12</sup>                | 92.7(3)    |
| Co1-O12 <sup>#1</sup> | 1.962(4)  | O5-Co1-O12 <sup>#1</sup>               | 94.90(15)  | O2 <sup>#9</sup> -Na1-O3 <sup>#12</sup> | 145.8(2)   |
| Co1-O10               | 1.985(4)  | O1-Co1-O10                             | 98.02(17)  | O6-Na1-O8 <sup>#12</sup>                | 128.31(16) |
| Co2-O7                | 1.974(5)  | O5-Co1-O10                             | 126.65(15) | O2 <sup>#9</sup> -Na1-O8 <sup>#12</sup> | 78.70(13)  |
| Co2-O7 <sup>#2</sup>  | 1.974(5)  | O12 <sup>#1</sup> -Co1-O10             | 104.13(15) | O6-Na1-O7 <sup>#4</sup>                 | 143.92(17) |
| Co2-O3                | 2.306(11) | O7-Co2-O7 <sup>#2</sup>                | 122.8(3)   | O2 <sup>#9</sup> -Na1-O7 <sup>#4</sup>  | 90.15(15)  |
| Co2-O3 <sup>#2</sup>  | 2.306(11) | O7-Co2-O3                              | 89.1(2)    | O3 <sup>#12</sup> -Na1-O7 <sup>#4</sup> | 71.4(2)    |
| Co2-O4                | 2.416(5)  | O7 <sup>#2</sup> -Co2-O3               | 98.9(3)    | O8 <sup>#12</sup> -Na1-O7 <sup>#4</sup> | 77.20(13)  |
| Co2-O4 <sup>#2</sup>  | 2.416(5)  | O7-Co2-O3 <sup>#2</sup>                | 98.9(3)    | O4 <sup>#9</sup> -Na2-O4                | 162.6(5)   |
| Na5-O8 <sup>#5</sup>  | 2.681(4)  | O7 <sup>#2</sup> -Co2-O3 <sup>#2</sup> | 89.1(2)    | O4 <sup>#9</sup> -Na2-O4 <sup>#2</sup>  | 106.8(4)   |
| Na5-O8 <sup>#6</sup>  | 2.681(4)  | O3-Co2-O3 <sup>#2</sup>                | 163.3(4)   | O4-Na2-O4 <sup>#2</sup>                 | 75.9(5)    |
| Na5-O2                | 2.698(5)  | O8 <sup>#5</sup> -Na5-O8 <sup>#6</sup> | 83.97(18)  | O4 <sup>#9</sup> -Na2-O4 <sup>#10</sup> | 75.9(5)    |
| Na5-O2 <sup>#7</sup>  | 2.698(5)  | O8 <sup>#5</sup> -Na5-O2               | 91.52(13)  | O4-Na2-O4 <sup>#10</sup>                | 106.8(4)   |
| Na5-O11 <sup>#1</sup> | 2.733(4)  | O8 <sup>#6</sup> -Na5-O2               | 80.25(14)  | O4 <sup>#2</sup> -Na2-O4 <sup>#10</sup> | 162.6(5)   |
| Na5-O11 <sup>#3</sup> | 2.733(4)  | O8 <sup>#5</sup> -Na5-O2 <sup>#7</sup> | 80.25(14)  | O4 <sup>#9</sup> -Na2-O13               | 73.3(3)    |
| Na1-O2 <sup>#9</sup>  | 2.616(5)  | O8 <sup>#6</sup> -Na5-O2 <sup>#7</sup> | 91.52(13)  | O4-Na2-O13                              | 89.3(3)    |

|                                                                                      |           |                                          |            |                                         |            |
|--------------------------------------------------------------------------------------|-----------|------------------------------------------|------------|-----------------------------------------|------------|
| Na1-O3 <sup>#12</sup>                                                                | 2.703(10) | O2- Na5-O2 <sup>#7</sup>                 | 169.10(12) | O4 <sup>#2</sup> -Na2-O13               | 102.4(3)   |
| Na1-O8 <sup>#12</sup>                                                                | 2.845(5)  | O8 <sup>#5</sup> - Na5-O11 <sup>#1</sup> | 171.70(12) | O4 <sup>#10</sup> -Na2-O13              | 94.8(4)    |
| Na1-O7 <sup>#4</sup>                                                                 | 2.875(6)  | O2- Na5-O11 <sup>#1</sup>                | 95.74(13)  | O9 <sup>#13</sup> -Na3-O9               | 144.9(2)   |
| Na2-O4 <sup>#9</sup>                                                                 | 2.323(5)  | O2- Na5-O11 <sup>#3</sup>                | 93.05(13)  | O9 <sup>#13</sup> -Na3-O9 <sup>#7</sup> | 101.0(3)   |
| Na2-O4 <sup>#2</sup>                                                                 | 2.323(5)  | Na3-O9 <sup>#7</sup>                     | 2.360(4)   | O9-Na3-O9 <sup>#7</sup>                 | 89.6(2)    |
| Na2-O4 <sup>#10</sup>                                                                | 2.323(5)  | Na3-O9 <sup>#14</sup>                    | 2.360(4)   | O9-Na3-O9 <sup>#14</sup>                | 101.0(3)   |
| Na2-O13                                                                              | 2.781(18) | Na4-O11 <sup>#16</sup>                   | 2.337(4)   | O11 <sup>#16</sup> -Na4-O11             | 90.1(2)    |
| Na2-O13 <sup>#10</sup>                                                               | 2.781(18) | Na4-O10 <sup>#12</sup>                   | 2.422(4)   | O11-Na4-O10 <sup>#12</sup>              | 112.14(14) |
| Na2-O13 <sup>#2</sup>                                                                | 2.781(18) | Na4-O10 <sup>#1</sup>                    | 2.422(4)   | O11-Na4-O10 <sup>#1</sup>               | 82.22(13)  |
| Na2-O13 <sup>#9</sup>                                                                | 2.781(18) | Na4-O9 <sup>#12</sup>                    | 2.721(5)   | O11-Na4-O9 <sup>#12</sup>               | 155.60(14) |
| Na3-O9 <sup>#13</sup>                                                                | 2.360(4)  | Na4-O9 <sup>#1</sup>                     | 2.721(5)   | O11-Na4-O9 <sup>#1</sup>                | 102.01(13) |
| Symmetrical Code: #1 -x+3/2,-y,-z-1/2 #2 -x+7/4,-y+3/4,z #3 x-1/4,y+1/4,-z-1/2       |           |                                          |            |                                         |            |
| #4 -x+2,-y+1/2,-z-1/2 #5 x-1/4,-y+1/2,z+1/4 #6 -x+3/2,y-1/4,z+1/4 #7 -x+5/4,-y+1/4,z |           |                                          |            |                                         |            |
| #9 -x+7/4,y,-z-1/4 #10 x,-y+3/4,-z-1/4 #12 x+1/4,y-1/4,-z-1/2 #13 -x+5/4,y,-z-3/4    |           |                                          |            |                                         |            |
| #14 x,-y+1/4,-z-3/4 #16 -x+7/4,-y-1/4,z                                              |           |                                          |            |                                         |            |

### Compound 2

|                                                                            |            |                                        |            |                                         |            |
|----------------------------------------------------------------------------|------------|----------------------------------------|------------|-----------------------------------------|------------|
| Mn1-O5 <sup>#1</sup>                                                       | 2.122(4)   | O5 <sup>#1</sup> -Mn1-O8 <sup>#2</sup> | 91.99(16)  | O7 <sup>#2</sup> -Mn2-O4                | 120.7(2)   |
| Mn1-O8 <sup>#2</sup>                                                       | 2.124(4)   | O5 <sup>#1</sup> -Mn1-O3               | 84.54(17)  | O7 <sup>#2</sup> -Mn2-O6 <sup>#3</sup>  | 141.9(2)   |
| Mn1-O3                                                                     | 2.199(5)   | O8 <sup>#2</sup> -Mn1-O3               | 96.06(17)  | O4-Mn2-O6 <sup>#3</sup>                 | 97.24(15)  |
| Mn1-O1 <sup>#3</sup>                                                       | 2.218(4)   | O5 <sup>#1</sup> -Mn1-O1 <sup>#3</sup> | 121.63(15) | O7 <sup>#2</sup> -Mn2-O10 <sup>#4</sup> | 85.09(18)  |
| Mn1-O9                                                                     | 2.224(5)   | O8 <sup>#2</sup> -Mn1-O1 <sup>#3</sup> | 146.05(15) | O4-Mn2-O10 <sup>#4</sup>                | 90.47(17)  |
| Mn1-O2 <sup>#3</sup>                                                       | 2.511(4)   | O3-Mn1-O1 <sup>#3</sup>                | 83.73(18)  | O6 <sup>#3</sup> -Mn2-O10 <sup>#4</sup> | 91.56(16)  |
| Mn2-O7 <sup>#2</sup>                                                       | 2.032(4)   | O5 <sup>#1</sup> -Mn1-O9               | 94.67(17)  | O7 <sup>#2</sup> -Mn2-O2 <sup>#3</sup>  | 89.81(16)  |
| Mn2-O4                                                                     | 2.112(4)   | O8 <sup>#2</sup> -Mn1-O9               | 92.38(17)  | O4-Mn2-O2 <sup>#3</sup>                 | 87.26(15)  |
| Mn2-O6 <sup>#3</sup>                                                       | 2.128(4)   | O1 <sup>#3</sup> -Mn1-O9               | 89.57(17)  | O6 <sup>#3</sup> -Mn2-O2 <sup>#3</sup>  | 95.95(15)  |
| Mn2-O10 <sup>#4</sup>                                                      | 2.144(4)   | O5 <sup>#1</sup> -Mn1-O2 <sup>#3</sup> | 170.29(15) | O10 <sup>#4</sup> -Mn2-O2 <sup>#3</sup> | 172.38(16) |
| Mn2-O2 <sup>#3</sup>                                                       | 2.215(4)   | O8 <sup>#2</sup> -Mn1-O2 <sup>#3</sup> | 91.21(14)  | O9-Mn1-O2 <sup>#3</sup>                 | 94.36(16)  |
| O3-Mn1-O9                                                                  | 171.55(16) | O3-Mn1-O2 <sup>#3</sup>                | 86.01(14)  | O1 <sup>#3</sup> -Mn1-O2 <sup>#3</sup>  | 54.86(12)  |
| Symmetrical Code: #1 -x+2,y,-z+5/2 #2 x+1/2,-y+1/2,z+1/2 #3 -x+2,-y+1,-z+3 |            |                                        |            |                                         |            |
| #4 x,-y+1,z+1/2                                                            |            |                                        |            |                                         |            |

## 2. QMC simulation details

**Algorithm of our fitting Program:** The quantum Monte Carlo calculations were performed by our fitting program, where we call LOOP module of ALPS and utilize five parameters ( $J$ ,  $g$ ,  $zJ$  and  $TIP$ ) to further fit the experimental result by use of exhaustive-iterative method. The corresponding formulas were shown in Eq(1)-Eq(4). The running procedure of our program is presented in the Figure S1. In following description, we exhibit fitting process of one  $J$ : In the beginning, the range of five parameters ( $J$ ,  $g$ ,  $zJ$  and  $TIP$ ) were respectively set to that: [ $J_1$ :  $J_2$ ], [ $g_1$ :  $g_2$ ], [ $TIP_1$ :

$TIP_2$ ], [ $zJ_1$ :  $zJ_2$ ], and the step sizes were set to  $\Delta J$ ,  $\Delta g$ ,  $\Delta TIP$  and  $\Delta zJ$ . Until the running is over, the best parameters ( $R_b$ ,  $J_b$ ,  $g_b$ ,  $TIP_b$ ,  $zJ_b$ ) were obtained.

$$\chi_u = \frac{1}{NT} \left\langle \left( \sum_{i=1}^N S_i^z \right)^2 \right\rangle \quad \text{Eq(1)}$$

where uniform magnetic susceptibility  $\chi_u$  is dimensionless.

Convert uniform magnetic susceptibility to  $\chi_T$  ( $\text{cm}^3 \text{mol}^{-1}$ )

$$\chi_T (\text{cm}^3 \text{mol}^{-1}) = Ag^2 \chi_u \quad \text{Eq(2)}$$

where  $g$  is Landé-factor and  $A$  is unit constant.

Import  $zJ$  and  $TIP$  factor to  $\chi_T$ , as bellows:

$$\chi_T' (\text{cm}^3 \text{mol}^{-1}) = \frac{(\chi_T + TIP)}{1 + \frac{zJ(\chi_T + TIP)}{0.1303g^2}} \quad \text{Eq(3)}$$

The reliability factor  $R$  is obtained by

$$R = \frac{\sum (\chi_T' T - \chi_{obs} T)^2}{\sum (\chi_{obs} T)^2} \quad \text{Eq(4)}$$

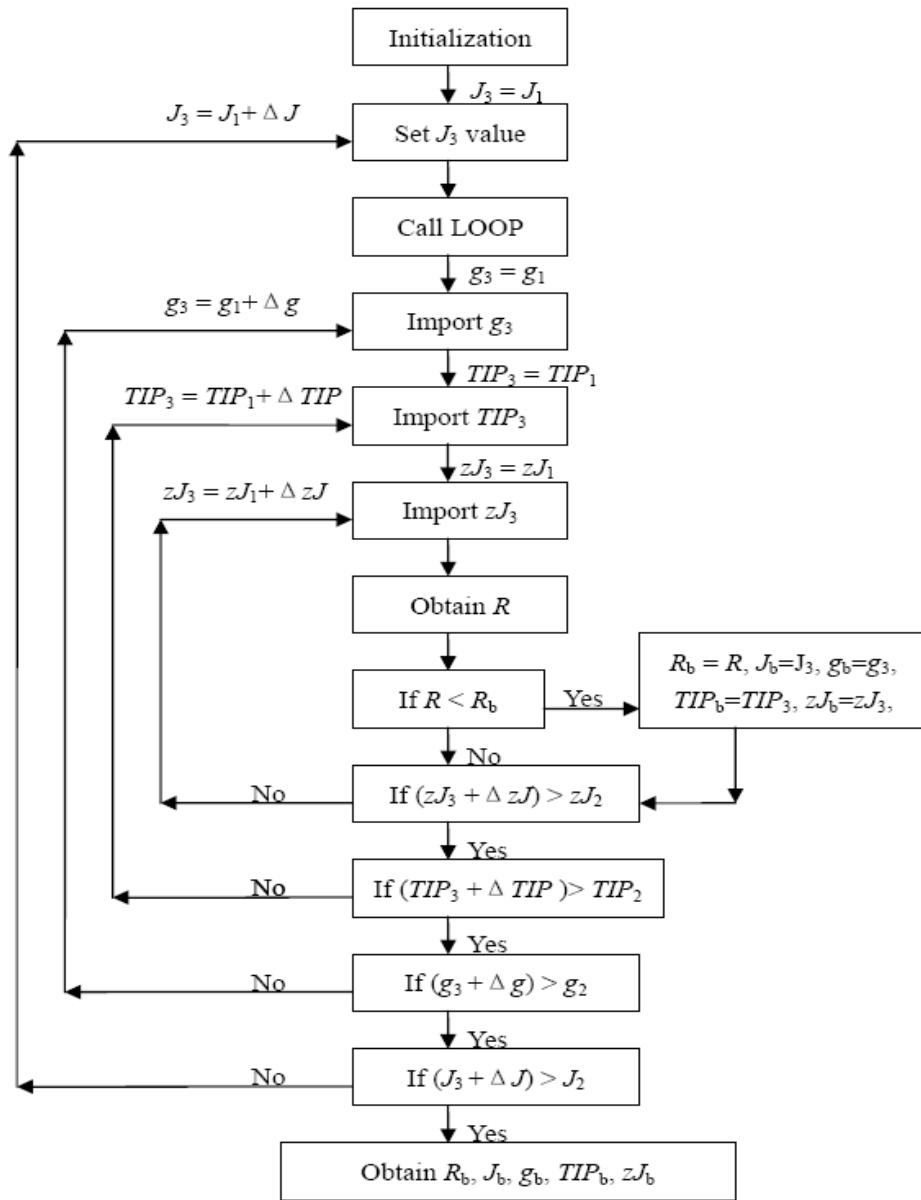

Figure S1 the running procedure of our program.

### 3. Structure of 1

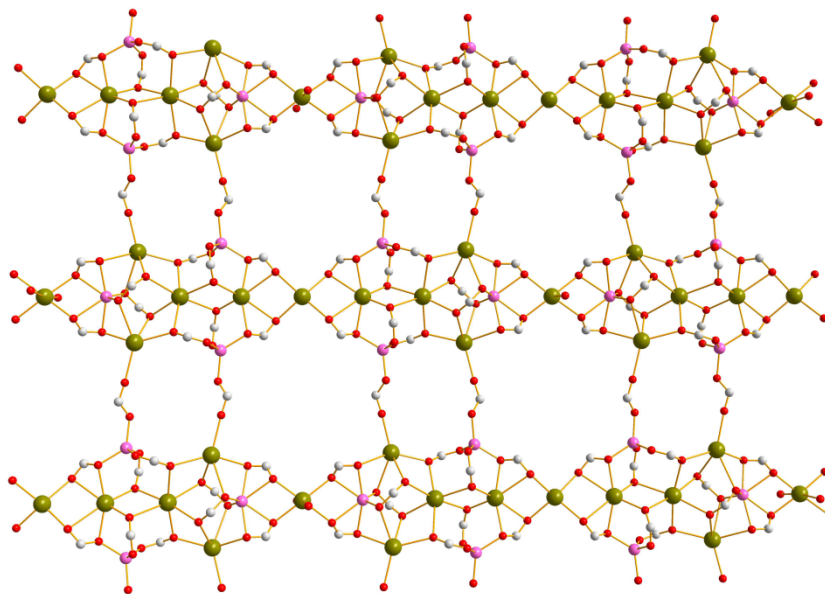

Fig. S2 three dimensional  $\text{Co}_3\text{Na}_6$  -based framework in **1**.

#### 4. Magnetic Properties of compounds **1** and **2**.

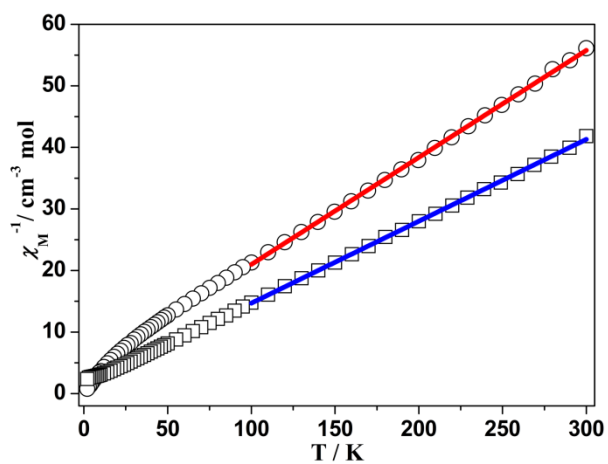

Fig. S3  $\chi_m^{-1}$  vs T plots of **1**( $\circ$ ) and **2**( $\square$ ); linear fitting over the range of 100K-300K of **1**(red solid line), **2**(blue solid line).

#### 6. PXRD of compounds **1** and **2**.

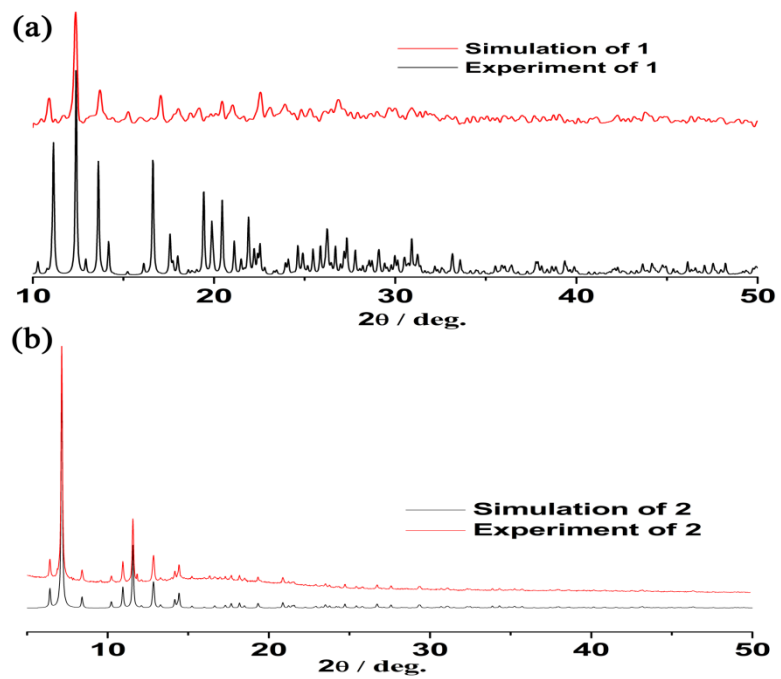

Fig. S4 Experimental and theoretical PXRD of 1 and 2.
